# Supplementary material for: Finite deformation of particulate geomaterials : frictional and anisotropic critical state elasto-plasticity
Source: PeerJ journal article supplement (doi:10.7717/peerj.13395), 2011-01-01
Supplement: Supplementary_Tables_and_Figs.pdf [file Supplementary_Tables_and_Figs.pdf]

# Can heat adaptation be transferred across ocean basins?

Emily J. Howells, Mary Hagedorn, Madeleine J. H. van Oppen, John A. Burt

## Supplementary Tables and Figures

**Table S1.** Analysis of variance table of the effects of sperm treatment (i.e., fresh versus cryopreserved) and egg donor colony on fertilization rates in *Platygyra daedalea*. Data were log (x +1) transformed to improve normality and homogeneity of variance.

| Source                      | df | SS      | MS      | F       | <i>p</i> | $\eta_p^2$ | $\eta^2$ |
|-----------------------------|----|---------|---------|---------|----------|------------|----------|
| Sperm treatment             | 1  | 154.688 | 154.688 | 736.366 | < 0.001  | 0.598      | 0.885    |
| Egg donor colony            | 5  | 52.368  | 10.474  | 49.858  | < 0.001  | 0.202      | 0.722    |
| Sperm treatment x egg donor | 5  | 31.424  | 6.285   | 29.918  | < 0.001  | 0.121      | 0.609    |
| Residuals                   | 96 | 20.167  | 0.21    |         |          |            |          |

**Table S2a.** Analysis of variance table of the effects of cryopreserved sperm source and egg donor colony on fertilization rates in *Platygyra daedalea*. Data were log (x +1) transformed to improve normality and homogeneity of variance.

| Source                   | df | SS     | MS     | F       | <i>p</i> | $\eta_p^2$ | $\eta^2$ |
|--------------------------|----|--------|--------|---------|----------|------------|----------|
| Sperm source             | 4  | 12.842 | 3.211  | 17.343  | < 0.001  | 0.100      | 0.536    |
| Egg donor colony         | 5  | 96.975 | 19.395 | 104.769 | < 0.001  | 0.755      | 0.897    |
| Sperm source x egg donor | 20 | 7.492  | 0.375  | 2.023   | 0.019    | 0.058      | 0.403    |
| Residuals                | 60 | 11.107 | 0.185  |         |          |            |          |

**Table S2b.** Tukey post-hoc contrasts of overall cryopreserved sperm population effects on fertilization rates in *Platygyra daedalea*.

| Contrast           | <i>t</i> | <i>p</i> |
|--------------------|----------|----------|
| Al Aqah - Nil      | 2.943    | 0.036    |
| Al Aqah - Pelorus  | -3.831   | 0.003    |
| Al Aqah - Saadiyat | -0.821   | 0.923    |
| Al Aqah - Trunk    | -4.203   | 0.001    |
| Nil - Pelorus      | -6.774   | < 0.001  |
| Nil - Saadiyat     | -3.764   | 0.003    |
| Nil - Trunk        | -7.146   | < 0.001  |
| Pelorus - Saadiyat | 3.010    | 0.030    |
| Pelorus - Trunk    | -0.371   | 0.996    |
| Saadiyat - Trunk   | -3.381   | 0.011    |

**Table S2c.** Tukey post-hoc contrasts of cryopreserved sperm source effects on fertilization rates in *Platygyra daedalea* for each egg donor colony.

| Egg donor colony | Contrast           | <i>t</i> | <i>p</i> |
|------------------|--------------------|----------|----------|
| Pelorus ♀1       | Al Aqah - Nil      | 0.000    | 1.000    |
|                  | Al Aqah - Pelorus  | -1.042   | 0.835    |
|                  | Al Aqah - Saadiyat | 0.000    | 1.000    |
|                  | Al Aqah - Trunk    | -2.631   | 0.077    |
|                  | Nil - Pelorus      | -1.042   | 0.835    |
|                  | Nil - Saadiyat     | 0.000    | 1.000    |
|                  | Nil - Trunk        | -2.631   | 0.077    |
|                  | Pelorus - Saadiyat | 1.042    | 0.835    |
|                  | Pelorus - Trunk    | -1.588   | 0.511    |
|                  | Saadiyat - Trunk   | -2.631   | 0.077    |
| Pelorus ♀2       | Al Aqah - Nil      | 0.700    | 0.956    |
|                  | Al Aqah - Pelorus  | -2.692   | 0.067    |
|                  | Al Aqah - Saadiyat | -0.640   | 0.968    |
|                  | Al Aqah - Trunk    | -1.649   | 0.473    |
|                  | Nil - Pelorus      | -3.391   | 0.010    |
|                  | Nil - Saadiyat     | -1.340   | 0.668    |
|                  | Nil - Trunk        | -2.348   | 0.144    |
|                  | Pelorus - Saadiyat | 2.052    | 0.255    |
|                  | Pelorus - Trunk    | 1.043    | 0.834    |
|                  | Saadiyat - Trunk   | -1.009   | 0.850    |
| Pelorus ♀3       | Al Aqah - Nil      | 0.000    | 1.000    |
|                  | Al Aqah - Pelorus  | -2.114   | 0.228    |
|                  | Al Aqah - Saadiyat | -1.042   | 0.835    |
|                  | Al Aqah - Trunk    | -0.723   | 0.950    |
|                  | Nil - Pelorus      | -2.114   | 0.228    |
|                  | Nil - Saadiyat     | -1.042   | 0.835    |
|                  | Nil - Trunk        | -0.723   | 0.950    |
|                  | Pelorus - Saadiyat | 1.072    | 0.820    |
|                  | Pelorus - Trunk    | 1.391    | 0.636    |
|                  | Saadiyat - Trunk   | 0.319    | 0.998    |
| Pelorus ♀4       | Al Aqah - Nil      | 2.959    | 0.034    |
|                  | Al Aqah - Pelorus  | -0.634   | 0.969    |
|                  | Al Aqah - Saadiyat | -0.613   | 0.972    |
|                  | Al Aqah - Trunk    | -1.576   | 0.519    |
|                  | Nil - Pelorus      | -3.593   | 0.006    |
|                  | Nil - Saadiyat     | -3.572   | 0.006    |
|                  | Nil - Trunk        | -4.535   | < 0.001  |
|                  | Pelorus - Saadiyat | 0.020    | 1.000    |
|                  | Pelorus - Trunk    | -0.942   | 0.879    |
|                  | Saadiyat - Trunk   | -0.962   | 0.871    |
| Trunk ♀5         | Al Aqah - Nil      | 0.423    | 0.993    |
|                  | Al Aqah - Pelorus  | -3.945   | 0.002    |
|                  | Al Aqah - Saadiyat | -2.843   | 0.046    |
|                  | Al Aqah - Trunk    | -3.367   | 0.011    |
|                  | Nil - Pelorus      | -4.368   | < 0.001  |
|                  | Nil - Saadiyat     | -3.266   | 0.015    |
|                  | Nil - Trunk        | -3.790   | 0.003    |
|                  | Pelorus - Saadiyat | 1.101    | 0.805    |
|                  | Pelorus - Trunk    | 0.578    | 0.978    |
|                  | Saadiyat - Trunk   | -0.524   | 0.985    |
| Trunk ♀6         | Al Aqah - Nil      | 3.127    | 0.022    |
|                  | Al Aqah - Pelorus  | 1.042    | 0.835    |
|                  | Al Aqah - Saadiyat | 3.127    | 0.022    |
|                  | Al Aqah - Trunk    | -0.349   | 0.997    |

|  |                    |        |       |
|--|--------------------|--------|-------|
|  | Nil - Pelorus      | -2.085 | 0.240 |
|  | Nil - Saadiyat     | 0.000  | 1.000 |
|  | Nil - Trunk        | -3.476 | 0.008 |
|  | Pelorus - Saadiyat | 2.085  | 0.240 |
|  | Pelorus - Trunk    | -1.391 | 0.636 |
|  | Saadiyat - Trunk   | -3.476 | 0.008 |

**Table S3a.** Analysis of variance table of the effects of sperm source and temperature on survival rates in *Platygyra daedalea*. Time was included as a random factor and data were  $x^2$  transformed to improve normality and homogeneity of variance.

| Source                     | df   | SS      | MS      | F      | $p$     | $\eta_p^2$ | $\eta^2$ |
|----------------------------|------|---------|---------|--------|---------|------------|----------|
| Sperm source               | 2,80 | 5.1E+07 | 2.5E+07 | 10.725 | < 0.001 | 0.117      | 0.211    |
| Temperature                | 1,80 | 1.4E+08 | 1.4E+08 | 60.443 | < 0.001 | 0.33       | 0.43     |
| Sperm source x temperature | 2,80 | 5.1E+07 | 2.5E+07 | 10.656 | < 0.001 | 0.116      | 0.21     |
| Residuals                  | 90   | 1.9E+08 | 2.1E+06 |        |         |            |          |

**Table S3b.** Tukey post-hoc contrasts of sperm source effects on survival rates in *Platygyra daedalea* for each experimental temperature.

| Temperature | Contrast                                       | $t$    | $p$     |
|-------------|------------------------------------------------|--------|---------|
| 27°C        | Pelorus cryopreserved – Pelorus fresh          | -2.901 | 0.013   |
|             | Pelorus cryopreserved – Saadiyat cryopreserved | -3.648 | 0.001   |
|             | Pelorus fresh – Saadiyat cryopreserved         | -0.746 | 0.737   |
| 33°C        | Pelorus cryopreserved – Pelorus fresh          | -3.491 | 0.002   |
|             | Pelorus cryopreserved – Saadiyat cryopreserved | 1.689  | 0.216   |
|             | Pelorus fresh – Saadiyat cryopreserved         | 5.179  | < 0.001 |

**Table S4a.** Analysis of variance table of the effects of DMSO sperm treatment and temperature on survival rates in *Platygyra daedalea*.

| Source             | df | SS      | MS      | F      | $p$     | $\eta_p^2$ | $\eta^2$ |
|--------------------|----|---------|---------|--------|---------|------------|----------|
| DMSO               | 1  | 5.6E+03 | 5.6E+03 | 32.031 | < 0.001 | 0.566      | 0.727    |
| Temperature        | 1  | 1.8E+03 | 1.8E+03 | 10.473 | 0.007   | 0.185      | 0.466    |
| DMSO x temperature | 1  | 3.7E+02 | 3.7E+02 | 2.097  | 0.173   | 0.037      | 0.149    |
| Residuals          | 12 | 2.1E+03 | 1.7E+02 |        |         |            |          |

**Table S4b.** Tukey post-hoc contrasts of sperm DMSO treatment effects on survival rates in *Platygyra daedalea* for each experimental temperature.

| Temperature | Contrast             | $t$   | $p$     |
|-------------|----------------------|-------|---------|
| 27°C        | No DMSO – DMSO added | 2.978 | 0.012   |
| 33°C        | No DMSO – DMSO added | 5.026 | < 0.001 |

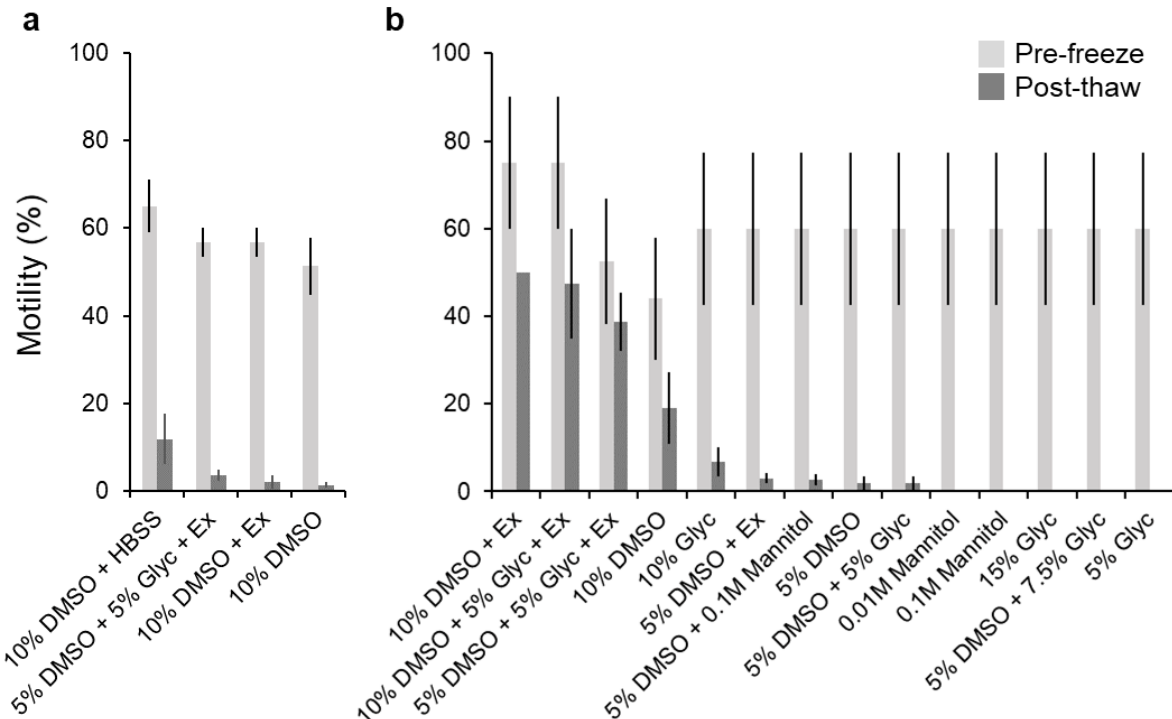

**Figure S1.** Pre-freeze and post-thaw motility of *Platygyra daedalea* (a) and *Acropora downingi* (b) sperm frozen with different cryoprotectants. Forward motility (mean %  $\pm$  standard error) was evaluated in 1:10 dilutions of samples across spawning nights in between 2012 and 2014 ( $n = 3-8$  and 2-5 spawning nights for *P. daedalea* and *A. downingi* per cryoprotectant treatment). Cryoprotectants used were dimethyl sulfoxide (DMSO), mannitol, glycerol (Glyc), commercial dual-sugar extender (Ex; Exodus 120PL; 50% final concentration), and Hanks' Balanced Salt Solution (HBSS; 2.8mM glucose final concentration).
